# Supplementary material for: A comprehensive metabolome profiling of Terminalia chebula, Terminalia bellerica, and Phyllanthus emblica to explore the medicinal potential of Triphala
Source: PubMed Central journal article supplement — Sci Rep. 2024 Dec 30;14:31635. doi: 10.1038/s41598-024-80544-6 (PMC11685403; doi:10.1038/s41598-024-80544-6), 2024-12-30
Supplement: 41598_2024_80544_MOESM5_ESM.pdf [file 41598_2024_80544_MOESM5_ESM.pdf]

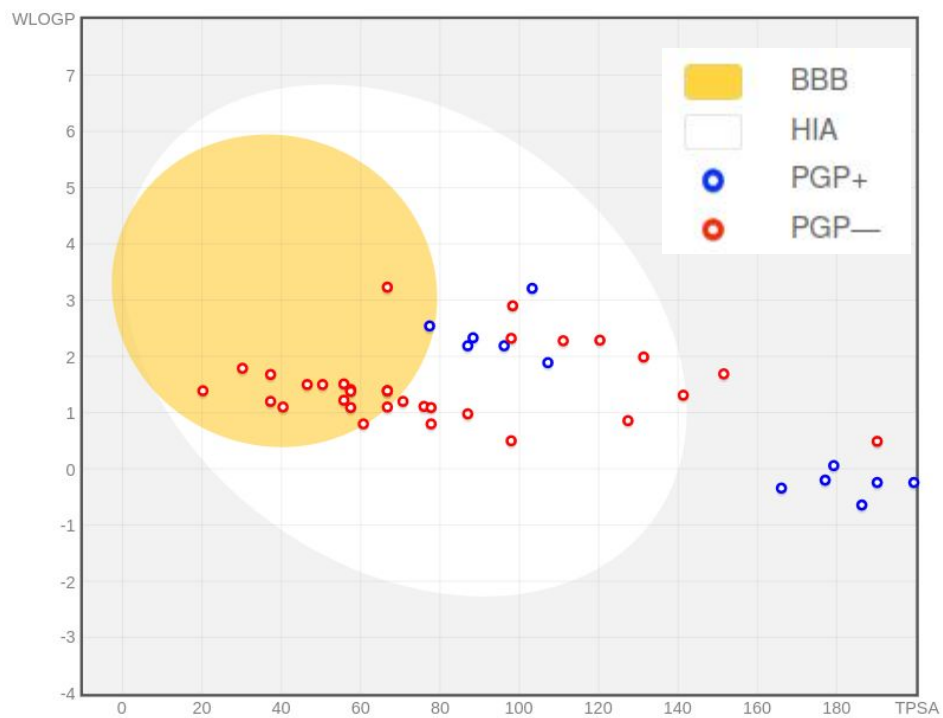

**Figure 1: BOILED-Egg Analysis Plot: Blood-Brain Barrier Permeation of Polyphenols from Triphala Ingredients (TC, PE, and TB) - Swiss ADME Results. The points located in the white ellipse represent compounds with high probability to be passively absorbed by the gastrointestinal tract. The points in the yellow ellipse (i.e. the yolk) are for compounds with high probability to permeate through the BBB to access the CNS. White and yolk are not mutually exclusive. Molecules not predicted to be well absorbed nor BBB permanent are in the grey zone. Points colored in blue are for molecules predicted to be substrates of the P-glycoprotein (PGP+) and hence actively pumped up from the brain or to the gastrointestinal lumen. If the predicted non-substrate of the P-glycoprotein (PGP-), the related point is in red.**

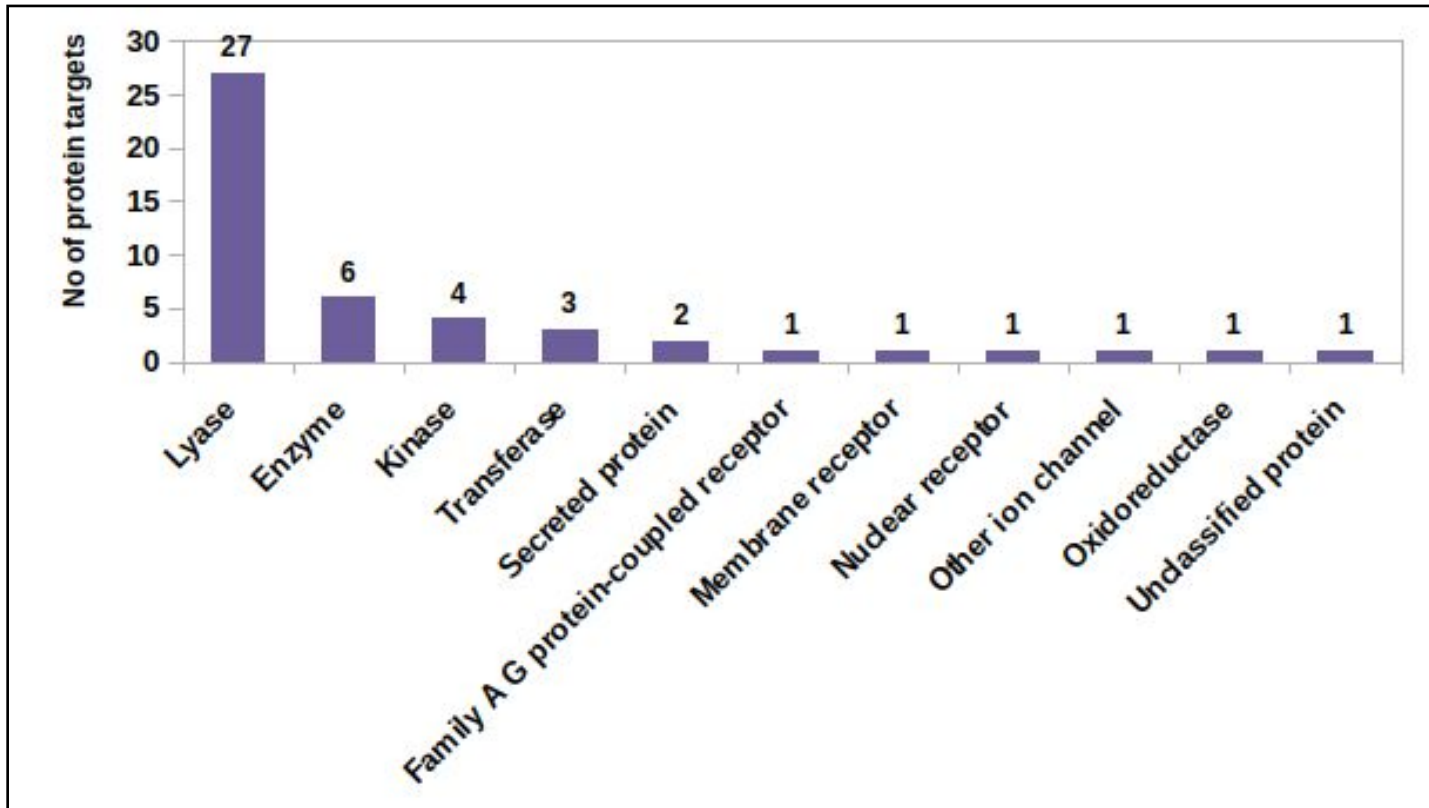

**Figure 2: Classification of potential human targets predicted from 5 common polyphenols in TC, PE and TB into different classes**

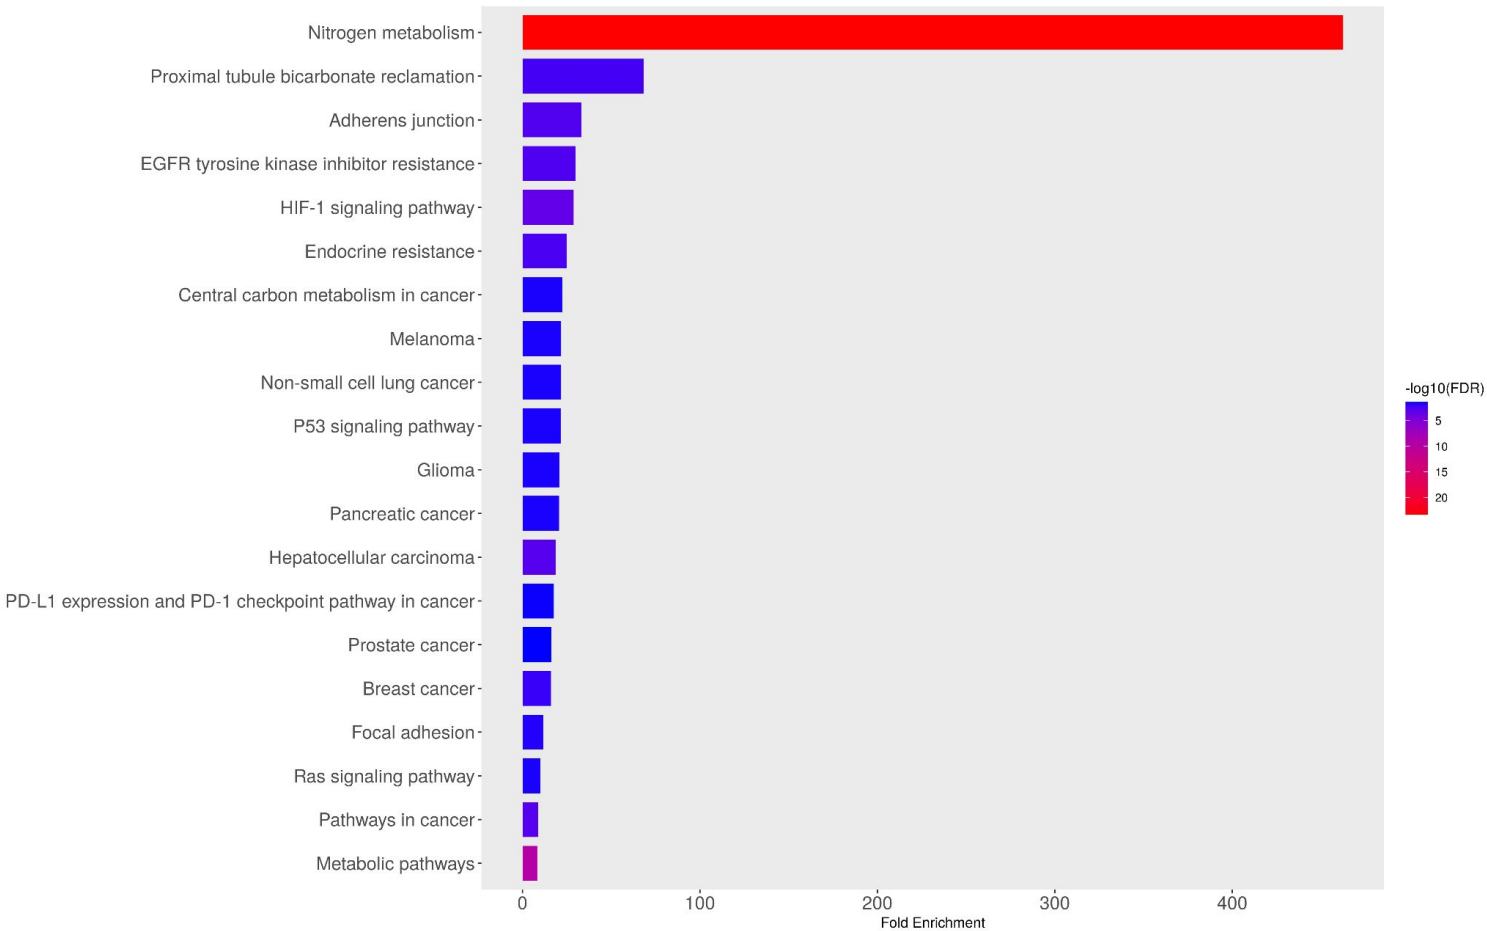

**Figure 3: Enriched pathways of human targets identified from common polyphenols from Triphala ingredients**

### Gallic acid

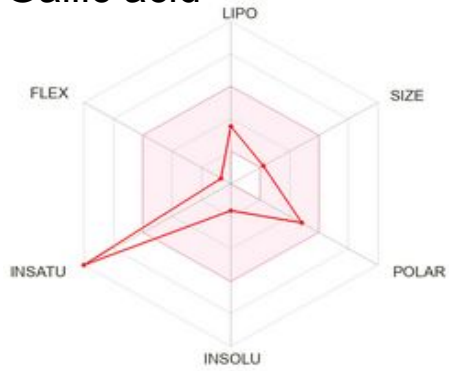

### Ferulaldehyde

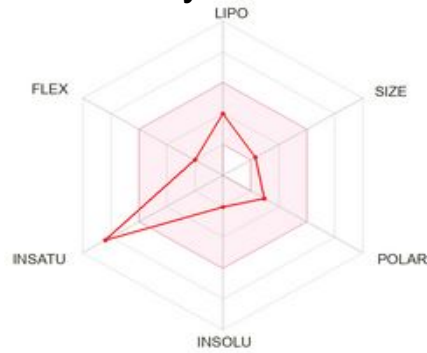

### Ethyl gallate

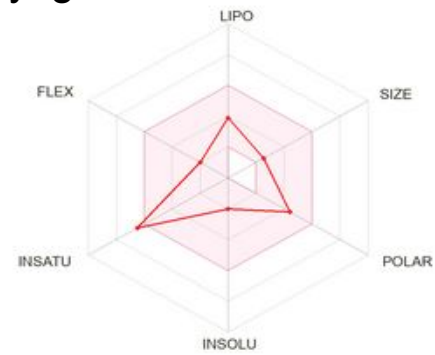

### Sinapaldehyde

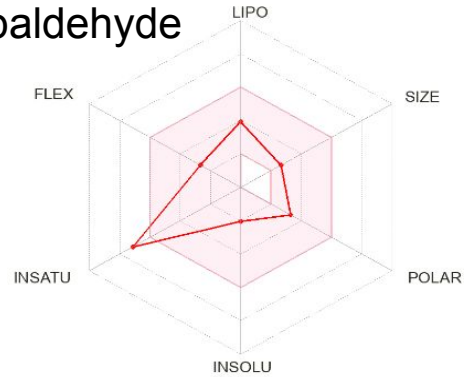

### Pyrogallol

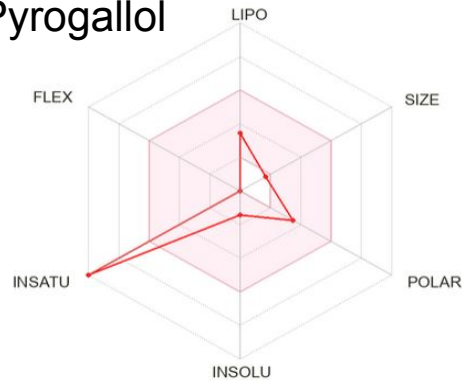

**Figure 4: Bioavailability Radar of 5 polyphenols commonly identified in TC, PE and TB**
